# Supplementary material
Source: PubMed Central journal article supplement (PMC4573374)
Supplement: NIHMS694338-supplement-AppTable2.pdf [file NIHMS694338-supplement-AppTable2.pdf]

| Parameters                                 | Rat Number           |                      |                      |                      |                      |                      |                      |                      | Mean                 | SD                   |
|--------------------------------------------|----------------------|----------------------|----------------------|----------------------|----------------------|----------------------|----------------------|----------------------|----------------------|----------------------|
|                                            | 1                    | 2                    | 3                    | 4                    | 5                    | 6                    | 7                    | 8                    |                      |                      |
| <b>BMO Area</b><br>( $\mu\text{m}^2$ )     | 6.15x10 <sup>4</sup> | 4.76x10 <sup>4</sup> | 5.26x10 <sup>4</sup> | 5.71x10 <sup>4</sup> | 5.18x10 <sup>4</sup> | 6.90x10 <sup>4</sup> | 5.40x10 <sup>4</sup> | 5.83x10 <sup>4</sup> | 5.65x10 <sup>4</sup> | 0.66x10 <sup>4</sup> |
| <b>Mean BMO Radii</b><br>( $\mu\text{m}$ ) | 139 ± 18             | 122 ± 14             | 129 ± 11             | 135 ± 6              | 128 ± 12             | 148 ± 8              | 131 ± 10             | 136 ± 7              | 133                  | 8                    |

**Appendix Table 2. BMO Size by Study Eye.**
