# Supplementary material
Source: PubMed Central journal article supplement (PMC4573374)
Supplement: NIHMS694338-supplement-AppTable3.pdf [file NIHMS694338-supplement-AppTable3.pdf]

| Parameters                              | Rat Number           |                      |                      |                      |                      |                      |                      |                      | Mean                 | SD                   |
|-----------------------------------------|----------------------|----------------------|----------------------|----------------------|----------------------|----------------------|----------------------|----------------------|----------------------|----------------------|
|                                         | 1                    | 2                    | 3                    | 4                    | 5                    | 6                    | 7                    | 8                    |                      |                      |
| <b>Neurovascular Canal</b>              |                      |                      |                      |                      |                      |                      |                      |                      |                      |                      |
| <i>ASCO Area</i> ( $\mu\text{m}^2$ )    | 1.49x10 <sup>5</sup> | 1.22x10 <sup>5</sup> | 1.23x10 <sup>5</sup> | 1.02x10 <sup>5</sup> | 1.57x10 <sup>5</sup> | 1.06x10 <sup>5</sup> | 1.38x10 <sup>5</sup> | 1.33x10 <sup>5</sup> | 1.29x10 <sup>5</sup> | 0.19x10 <sup>5</sup> |
| <i>ASCO Radius</i> ( $\mu\text{m}$ )    | 216 $\pm$ 25         | 196 $\pm$ 21         | 196 $\pm$ 29         | 180 $\pm$ 16         | 223 $\pm$ 16         | 183 $\pm$ 18         | 209 $\pm$ 16         | 205 $\pm$ 25         | 201                  | 15                   |
| <i>ASCO H/V Diameter Ratio</i>          | 1.24                 | 1.26                 | 1.42                 | 1.26                 | 1.11                 | 1.25                 | 1.17                 | 1.38                 | 1.26                 | 0.10                 |
| <i>PSCO Area</i> ( $\mu\text{m}^2$ )    | 1.59x10 <sup>5</sup> | 1.13x10 <sup>5</sup> | 1.40x10 <sup>5</sup> | 1.13x10 <sup>5</sup> | 1.54x10 <sup>5</sup> | 1.22x10 <sup>5</sup> | 1.58x10 <sup>5</sup> | 1.09x10 <sup>5</sup> | 1.33x10 <sup>5</sup> | 0.21x10 <sup>5</sup> |
| <i>PSCO Radius</i> ( $\mu\text{m}$ )    | 223 $\pm$ 30         | 189 $\pm$ 15         | 209 $\pm$ 30         | 189 $\pm$ 18         | 220 $\pm$ 20         | 197 $\pm$ 13         | 223 $\pm$ 17         | 185 $\pm$ 23         | 204                  | 16                   |
| <i>PSCO H/V Diameter Ratio</i>          | 1.47                 | 1.10                 | 1.40                 | 1.20                 | 1.13                 | 1.21                 | 1.36                 | 1.33                 | 1.27                 | 0.13                 |
| <b>Optic nerve</b>                      |                      |                      |                      |                      |                      |                      |                      |                      |                      |                      |
| <i>ON-ASCO Area</i> ( $\mu\text{m}^2$ ) | 4.54x10 <sup>4</sup> | 4.26x10 <sup>4</sup> | 4.36x10 <sup>4</sup> | 4.46x10 <sup>4</sup> | 5.37x10 <sup>4</sup> | 4.73x10 <sup>4</sup> | 4.16x10 <sup>4</sup> | 5.20x10 <sup>4</sup> | 4.63x10 <sup>4</sup> | 0.44x10 <sup>4</sup> |
| <i>ON-ASCO Radius</i> ( $\mu\text{m}$ ) | 117 $\pm$ 27         | 112 $\pm$ 33         | 114 $\pm$ 32         | 115 $\pm$ 32         | 128 $\pm$ 29         | 120 $\pm$ 28         | 112 $\pm$ 25         | 127 $\pm$ 24         | 118                  | 6                    |
| <i>ON-ASCO H/V Diameter Ratio</i>       | 1.82                 | 2.18                 | 2.18                 | 2.08                 | 1.97                 | 1.88                 | 1.86                 | 1.66                 | 1.95                 | 0.19                 |
| <i>ON-PSCO Area</i> ( $\mu\text{m}^2$ ) | 4.81x10 <sup>4</sup> | 4.28x10 <sup>4</sup> | 4.14x10 <sup>4</sup> | 3.99x10 <sup>4</sup> | 5.34x10 <sup>4</sup> | 4.37x10 <sup>4</sup> | 4.25x10 <sup>4</sup> | 4.14x10 <sup>4</sup> | 4.41x10 <sup>4</sup> | 0.45x10 <sup>4</sup> |
| <i>ON-PSCO Radius</i> ( $\mu\text{m}$ ) | 117 $\pm$ 41         | 108 $\pm$ 44         | 107 $\pm$ 41         | 105 $\pm$ 43         | 124 $\pm$ 41         | 111 $\pm$ 42         | 112 $\pm$ 33         | 106 $\pm$ 43         | 111                  | 6                    |
| <i>ON-PSCO H/V Diameter Ratio</i>       | 2.41                 | 2.72                 | 2.60                 | 2.97                 | 2.29                 | 2.55                 | 1.89                 | 1.81                 | 2.41                 | 0.40                 |
| <i>ON Volume</i> ( $\mu\text{m}^3$ )    | 3.95x10 <sup>6</sup> | 2.92x10 <sup>6</sup> | 2.29x10 <sup>6</sup> | 3.25x10 <sup>6</sup> | 4.04x10 <sup>6</sup> | 3.20x10 <sup>6</sup> | 2.88x10 <sup>6</sup> | 3.67x10 <sup>6</sup> | 3.28x10 <sup>6</sup> | 0.59x10 <sup>6</sup> |

\* See Appendix Figures 1 and 2 for an explanation of each parameter.

**Appendix Table 3. The neurovascular scleral canal and its contained optic nerve\***
