# Supplementary material
Source: PubMed Central journal article supplement (PMC4573374)
Supplement: NIHMS694338-supplement-AppTable4.pdf [file NIHMS694338-supplement-AppTable4.pdf]

| Parameters                       | Rat Number |         |         |         |         |         |         |         | Mean | SD |
|----------------------------------|------------|---------|---------|---------|---------|---------|---------|---------|------|----|
|                                  | 1          | 2       | 3       | 4       | 5       | 6       | 7       | 8       |      |    |
| <b><i>BMO Depth</i></b> (μm)     | 16 ±11     | 47 ±9   | 39 ±5   | 36 ±9   | 26±10   | 37 ±6   | -1 ±5   | 33 ±8   | 29   | 15 |
| <b><i>ASCO Depth</i></b> (μm)    | 78 ±22     | 104 ±20 | 112 ±18 | 105 ±16 | 88±17   | 106 ±23 | 73 ±13  | 94 ±15  | 95   | 14 |
| <b><i>PSCO Depth</i></b> (μm)    | 160 ±28    | 170 ±25 | 167 ±20 | 182 ±19 | 164 ±23 | 172 ±27 | 141 ±23 | 171 ±29 | 165  | 13 |
| <b><i>Scleral Depth</i></b> (μm) | 27±36      | 39±29   | 38±28   | 32±27   | 38±24   | 37±26   | 19±23   | 33 ±25  | 33   | 7  |

\* See Appendix Figure 3 for an explanation of each parameter.

**Appendix Table 4. *BMO Depth, ASCO depth, PSCO depth and Anterior Peripapillary Scleral Depth* relative to a peripheral anterior scleral reference plane\***
