# Supplementary material
Source: PubMed Central journal article supplement (PMC4573374)
Supplement: NIHMS694338-supplement-AppTable5.pdf [file NIHMS694338-supplement-AppTable5.pdf]

| Parameters                      | Rat Number |         |         |         |         |         |         |        | Mean | SD |
|---------------------------------|------------|---------|---------|---------|---------|---------|---------|--------|------|----|
|                                 | 1          | 2       | 3       | 4       | 5       | 6       | 7       | 8      |      |    |
| <i>Scleral Thickness (μm)</i>   | 109 ±26    | 105 ±23 | 107 ±19 | 105 ±19 | 105 ±15 | 110 ±18 | 101 ±25 | 97 ±23 | 105  | 4  |
| <i>Choroidal Thickness (μm)</i> | 56 ±13     | 45 ±11  | 54 ±14  | 55 ±11  | 60 ±11  | 70 ±26  | 61 ±14  | 54 ±10 | 57   | 7  |

\* See Appendix Figure 4 for an explanation of each parameter.

**Appendix Table 5. Peripapillary Scleral and Choroidal Thickness (Appendix Figure 4)\***
