# Supplementary material
Source: PubMed Central journal article supplement (PMC4573374)
Supplement: NIHMS694338-supplement-AppTable6.pdf [file NIHMS694338-supplement-AppTable6.pdf]

| Parameters <sup>1</sup>               | Superior | Inferior | Nasal   | Temporal |
|---------------------------------------|----------|----------|---------|----------|
|                                       | Mean±SD  | Mean±SD  | Mean±SD | Mean±SD  |
| <b>Neural/Venous Canal</b>            |          |          |         |          |
| <i>BMO Radius</i>                     | 135±10   | 138±15   | 132±11  | 128±16   |
| <i>BMO Depth</i>                      | 27±13    | 32±17    | 32±16   | 26±18    |
| <i>ASCO Radius</i> <sup>2</sup>       | 187±22   | 186±21   | 217±22  | 214±19*  |
| <i>ASCO Depth</i>                     | 83±15    | 113±20   | 101±17  | 84±22    |
| <i>PSCO Radius</i> <sup>2</sup>       | 196±25   | 188±22   | 213±22  | 222±23*  |
| <i>PSCO Depth</i>                     | 145±16   | 189±19   | 177±24  | 152±20   |
| <b>Optic Nerve</b>                    |          |          |         |          |
| <i>ON-ASCO Radius</i> <sup>2</sup>    | 98±9     | 90±14    | 141±20* | 142±22*  |
| <i>ON-PSCO Radius</i> <sup>2</sup>    | 86±10*   | 68±12    | 145±31* | 146±29*  |
| <b>Sclera/choroid</b>                 |          |          |         |          |
| <i>Scleral Thickness</i> <sup>2</sup> | 99±14*   | 91±20    | 113±19* | 116±23*  |
| <i>Scleral Depth</i> <sup>2</sup>     | 30±25*   | 41±31*   | 37±27*  | 22±26    |
| <i>Choroidal Thickness</i>            | 57±11*   | 56±14    | 59±22*  | 55±15    |

<sup>1</sup>Only parameters which include multiple measurements per region were included in this analysis

<sup>2</sup>Regional effects for this parameter are statistically significant within ANOVA using a linear mixed effects model (p<0.05, after adjustment for multiple comparisons).

**Blue:** quadrant with the lowest value. All other quadrants were compared to the quadrant with the lowest value.

\*this regional value is significantly different from the lowest regional value of this parameter (p<0.05, ANOVA after adjustment for multiple comparisons).

## Appendix Table 6. Overall Regional Values for each Parameter
